# Supplementary material for: Synthesis of non-toxic inorganic blue pigments in the melilite-type structure
Source: Royal Society of Chemistry journal article supplement (doi:10.1039/d0ma00541j), 2020-01-01
Supplement: d0ma00541j1.pdf [file d0ma00541j1.pdf]

Supplementary Information for:

Synthesis of non-toxic inorganic blue pigments in the melilite-type structure

Georg Gramm<sup>a</sup>, Gerda Fuhrmann<sup>a</sup>, Kevin Ploner<sup>b</sup>, Simon Penner<sup>b</sup>, and Hubert Huppertz<sup>a\*</sup>

a) *Institute of General, Inorganic, and Theoretical Chemistry, University of Innsbruck*

*Innrain 80-82, 6020 Innsbruck, Austria*

b) *Institute of Physical Chemistry, University of Innsbruck*

*Innrain 52c, 6020 Innsbruck, Austria*

- 1.) CIE  $L^*a^*b^*$  color coordinates
- 2.) Crystallographic data of Rietveld refinements
- 3.) Rietveld plots

Table S1: CIE  $L^*a^*b^*$  color coordinates of the  $\text{Sr}_2\text{Mg}_{1-x}\text{Mn}_x\text{Ge}_{2-y}\text{Si}_y\text{O}_{7+\delta}$  ( $0 \leq x \leq 1$ ;  $0 \leq y \leq 2$ ) samples.

| Sample                                                                                       | $L^*$ | $a^*$ | $b^*$  |
|----------------------------------------------------------------------------------------------|-------|-------|--------|
| $\text{Sr}_2\text{MgGe}_2\text{O}_7$                                                         | 92.62 | 0.13  | -3.14  |
| $\text{Sr}_2\text{Mg}_{0.8}\text{Mn}_{0.2}\text{Ge}_2\text{O}_{7+\delta}$                    | 47.15 | 6.93  | -26.24 |
| $\text{Sr}_2\text{Mg}_{0.6}\text{Mn}_{0.4}\text{Ge}_2\text{O}_{7+\delta}$                    | 34.90 | 8.39  | -23.60 |
| $\text{Sr}_2\text{Mg}_{0.4}\text{Mn}_{0.6}\text{Ge}_2\text{O}_{7+\delta}$                    | 24.48 | 7.61  | -17.26 |
| $\text{Sr}_2\text{Mg}_{0.2}\text{Mn}_{0.8}\text{Ge}_2\text{O}_{7+\delta}$                    | 25.31 | 4.43  | -16.66 |
| $\text{Sr}_2\text{MnGe}_2\text{O}_7$                                                         | 22.77 | 1.71  | -3.52  |
| $\text{Sr}_2\text{Mg}_{0.8}\text{Mn}_{0.2}\text{Ge}_{1.5}\text{Si}_{0.5}\text{O}_{7+\delta}$ | 51.53 | 3.82  | -23.67 |
| $\text{Sr}_2\text{Mg}_{0.6}\text{Mn}_{0.4}\text{Ge}_{1.5}\text{Si}_{0.5}\text{O}_{7+\delta}$ | 33.16 | 7.62  | -24.74 |
| $\text{Sr}_2\text{Mg}_{0.2}\text{Mn}_{0.8}\text{Ge}_{1.5}\text{Si}_{0.5}\text{O}_{7+\delta}$ | 29.01 | 6.40  | -17.60 |
| $\text{Sr}_2\text{Mg}_{0.8}\text{Mn}_{0.2}\text{GeSiO}_{7+\delta}$                           | 62.52 | 2.79  | -22.64 |
| $\text{Sr}_2\text{Mg}_{0.6}\text{Mn}_{0.4}\text{GeSiO}_{7+\delta}$                           | 29.98 | 8.82  | -25.07 |
| $\text{Sr}_2\text{Mg}_{0.3}\text{Mn}_{0.7}\text{GeSiO}_{7+\delta}$                           | 27.52 | 7.39  | -17.89 |
| $\text{Sr}_2\text{Mg}_{0.2}\text{Mn}_{0.8}\text{GeSiO}_{7+\delta}$                           | 27.60 | 8.89  | -22.11 |
| $\text{Sr}_2\text{Mg}_{0.8}\text{Mn}_{0.2}\text{Ge}_{0.5}\text{Si}_{1.5}\text{O}_{7+\delta}$ | 64.48 | 2.12  | -19.96 |
| $\text{Sr}_2\text{Mg}_{0.6}\text{Mn}_{0.4}\text{Ge}_{0.5}\text{Si}_{1.5}\text{O}_{7+\delta}$ | 35.56 | 8.03  | -26.70 |
| $\text{Sr}_2\text{Mg}_{0.2}\text{Mn}_{0.8}\text{Ge}_{0.5}\text{Si}_{1.5}\text{O}_{7+\delta}$ | 31.43 | 10.79 | -27.76 |
| $\text{Sr}_2\text{MnGe}_{0.5}\text{Si}_{1.5}\text{O}_{7+\delta}$                             | 28.31 | 10.57 | -25.61 |
| $\text{Sr}_2\text{Mg}_{0.8}\text{Mn}_{0.2}\text{Ge}_{0.4}\text{Si}_{1.6}\text{O}_{7+\delta}$ | 57.43 | 4.32  | -24.25 |
| $\text{Sr}_2\text{Mg}_{0.6}\text{Mn}_{0.4}\text{Ge}_{0.4}\text{Si}_{1.6}\text{O}_{7+\delta}$ | 47.80 | 7.14  | -27.31 |
| $\text{Sr}_2\text{Mg}_{0.2}\text{Mn}_{0.8}\text{Ge}_{0.4}\text{Si}_{1.6}\text{O}_{7+\delta}$ | 33.03 | 9.93  | -27.05 |
| $\text{Sr}_2\text{Mg}_{0.1}\text{Mn}_{0.9}\text{Ge}_{0.4}\text{Si}_{1.6}\text{O}_{7+\delta}$ | 31.43 | 9.78  | -25.72 |
| $\text{Sr}_2\text{MnGe}_{0.4}\text{Si}_{1.6}\text{O}_{7+\delta}$                             | 28.53 | 9.26  | -23.24 |

|                                                                                                |       |       |        |
|------------------------------------------------------------------------------------------------|-------|-------|--------|
| $\text{Sr}_2\text{Mg}_{0.3}\text{Mn}_{0.7}\text{Ge}_{0.3}\text{Si}_{1.7}\text{O}_{7+\delta}$   | 36.43 | 10.31 | -29.55 |
| $\text{Sr}_2\text{Mg}_{0.2}\text{Mn}_{0.8}\text{Ge}_{0.3}\text{Si}_{1.7}\text{O}_{7+\delta}$   | 33.04 | 10.54 | -28.53 |
| $\text{Sr}_2\text{Mg}_{0.8}\text{Mn}_{0.2}\text{Ge}_{0.2}\text{Si}_{1.8}\text{O}_{7+\delta}$   | 66.74 | 2.66  | -21.03 |
| $\text{Sr}_2\text{Mg}_{0.5}\text{Mn}_{0.5}\text{Ge}_{0.2}\text{Si}_{1.8}\text{O}_{7+\delta}$   | 45.98 | 7.45  | -28.76 |
| $\text{Sr}_2\text{Mg}_{0.3}\text{Mn}_{0.7}\text{Ge}_{0.2}\text{Si}_{1.8}\text{O}_{7+\delta}$   | 37.85 | 10.10 | -30.71 |
| $\text{Sr}_2\text{Mg}_{0.2}\text{Mn}_{0.8}\text{Ge}_{0.2}\text{Si}_{1.8}\text{O}_{7+\delta}$   | 35.67 | 10.92 | -31.16 |
| $\text{Sr}_2\text{MnGe}_{0.5}\text{Si}_{1.8}\text{O}_{7+\delta}$                               | 32.15 | 10.51 | -29.19 |
| $\text{Sr}_2\text{Mg}_{0.2}\text{Mn}_{0.8}\text{Ge}_{0.1}\text{Si}_{1.9}\text{O}_{7+\delta}$   | 30.44 | 10.47 | -28.05 |
| $\text{Sr}_2\text{Mg}_{0.1}\text{Mn}_{0.9}\text{Ge}_{0.1}\text{Si}_{1.9}\text{O}_{7+\delta}$   | 35.47 | 10.57 | -31.06 |
| $\text{Sr}_2\text{MnGe}_{0.1}\text{Si}_{1.9}\text{O}_{7+\delta}$                               | 32.30 | 11.17 | -29.87 |
| $\text{Sr}_2\text{Mg}_{0.8}\text{Mn}_{0.2}\text{Ge}_{0.05}\text{Si}_{1.95}\text{O}_{7+\delta}$ | 79.22 | 1.36  | -13.18 |
| $\text{Sr}_2\text{Mg}_{0.5}\text{Mn}_{0.5}\text{Ge}_{0.05}\text{Si}_{1.95}\text{O}_{7+\delta}$ | 53.08 | 5.20  | -26.29 |
| $\text{Sr}_2\text{Mg}_{0.2}\text{Mn}_{0.8}\text{Ge}_{0.05}\text{Si}_{1.95}\text{O}_{7+\delta}$ | 47.70 | 5.68  | -28.55 |
| $\text{Sr}_2\text{MnGe}_{0.05}\text{Si}_{1.95}\text{O}_{7+\delta}$                             | 38.93 | 8.98  | -30.97 |
| $\text{Sr}_2\text{MgSi}_2\text{O}_7$                                                           | 2.97  | 4.97  | 1.97   |
| $\text{Sr}_2\text{Mg}_{0.8}\text{Mn}_{0.2}\text{Si}_2\text{O}_{7+\delta}$                      | 77.39 | 1.46  | -25.46 |
| $\text{Sr}_2\text{Mg}_{0.6}\text{Mn}_{0.4}\text{Si}_2\text{O}_{7+\delta}$                      | 57.88 | 5.01  | -27.04 |
| $\text{Sr}_2\text{Mg}_{0.5}\text{Mn}_{0.5}\text{Si}_2\text{O}_{7+\delta}$                      | 57.18 | 5.08  | -28.53 |
| $\text{Sr}_2\text{Mg}_{0.4}\text{Mn}_{0.6}\text{Si}_2\text{O}_{7+\delta}$                      | 49.08 | 7.27  | -30.05 |
| $\text{Sr}_2\text{Mg}_{0.3}\text{Mn}_{0.7}\text{Si}_2\text{O}_{7+\delta}$                      | 43.33 | 8.07  | -31.27 |
| $\text{Sr}_2\text{Mg}_{0.2}\text{Mn}_{0.8}\text{Si}_2\text{O}_{7+\delta}$                      | 45.11 | 7.35  | -31.35 |
| $\text{Sr}_2\text{MnSi}_2\text{O}_7$                                                           | 43.53 | 6.19  | -29.62 |
| $\text{CoAl}_2\text{O}_4$ (Cobalt blue PB28)                                                   | 39.41 | 3.76  | -46.01 |

Table S2: Crystallographic data of the Rietveld refinements.

| Sample                    | $\text{Sr}_2\text{Mg}_{0.2}\text{Mn}_{0.8}\text{Si}_2\text{O}_{7+\delta}$ | $\text{Sr}_2\text{Mg}_{0.2}\text{Mn}_{0.8}\text{Ge}_{0.5}\text{Si}_{1.5}\text{O}_{7+\delta}$ | $\text{Sr}_2\text{Mg}_{0.2}\text{Mn}_{0.8}\text{GeSiO}_{7+\delta}$ |
|---------------------------|---------------------------------------------------------------------------|----------------------------------------------------------------------------------------------|--------------------------------------------------------------------|
| Crystal system            | tetragonal                                                                |                                                                                              |                                                                    |
| Space group               | <i>P</i> 4 <sub>1</sub> <i>m</i>                                          |                                                                                              |                                                                    |
| <i>a</i> / Å              | 8.0925(3)                                                                 | 8.0553(4)                                                                                    | 8.07216(3)                                                         |
| <i>c</i> / Å              | 5.1534(3)                                                                 | 5.2275(5)                                                                                    | 5.2866(4)                                                          |
| <i>V</i> / Å <sup>3</sup> | 337.49(3)                                                                 | 339.20(5)                                                                                    | 344.51(4)                                                          |
| Formula units /Z          | 2                                                                         |                                                                                              |                                                                    |
| GOF ( $\chi^2$ )          | 2.71                                                                      | 2.63                                                                                         | 3.06                                                               |
| <i>R</i> <sub>exp</sub>   | 0.61                                                                      | 0.84                                                                                         | 0.66                                                               |
| <i>R</i> <sub>wp</sub>    | 1.66                                                                      | 2.20                                                                                         | 2.03                                                               |
| <i>R</i> <sub>p</sub>     | 1.01                                                                      | 1.25                                                                                         | 1.14                                                               |
| Radiation                 | Mo- <i>K</i> <sub>α1</sub> ( $\lambda = 0.7093$ Å)                        |                                                                                              |                                                                    |
| Profile range /°          | $1.0 \leq \theta \leq 20.2$                                               |                                                                                              |                                                                    |
| Peak Type                 | PV-TCHZ                                                                   |                                                                                              |                                                                    |
| Data Points               | 2560                                                                      |                                                                                              |                                                                    |
| Background                | Chebychev polynomial (12 parameters)                                      |                                                                                              |                                                                    |

| Sample                   | $\text{Sr}_2\text{Mg}_{0.2}\text{Mn}_{0.8}\text{Ge}_{1.5}\text{Si}_{0.5}\text{O}_{7+\delta}$ | $\text{Sr}_2\text{MgSi}_2\text{O}_{7+\delta}$ | $\text{Sr}_2\text{MnSi}_2\text{O}_{7+\delta}$ | $\text{Sr}_2\text{Mg}_{0.2}\text{Mn}_{0.8}\text{Ge}_2\text{O}_{7+\delta}$ |
|--------------------------|----------------------------------------------------------------------------------------------|-----------------------------------------------|-----------------------------------------------|---------------------------------------------------------------------------|
| Crystal system           | tetragonal                                                                                   |                                               |                                               |                                                                           |
| Space group              | <i>P</i> 4 <sub>1</sub> <i>m</i>                                                             |                                               |                                               |                                                                           |
| <i>a</i> /Å              | 8.0760(3)                                                                                    | 8.0102(5)                                     | 8.0979(2)                                     | 8.0869(3)                                                                 |
| <i>c</i> /Å              | 5.3348(3)                                                                                    | 5.1640(5)                                     | 5.1526(3)                                     | 5.3777(4)                                                                 |
| <i>V</i> /Å <sup>3</sup> | 347.95(3)                                                                                    | 331.34(5)                                     | 337.89(3)                                     | 351.69(4)                                                                 |
| Formula units /Z         | 2                                                                                            |                                               |                                               |                                                                           |
| GOF ( $\chi^2$ )         | 2.82                                                                                         | 4.51                                          | 2.37                                          | 2.58                                                                      |
| <i>R</i> <sub>exp</sub>  | 0.59                                                                                         | 0.39                                          | 0.63                                          | 0.73                                                                      |
| <i>R</i> <sub>wp</sub>   | 1.67                                                                                         | 1.76                                          | 1.48                                          | 1.89                                                                      |
| <i>R</i> <sub>p</sub>    | 1.04                                                                                         | 1.04                                          | 0.91                                          | 1.22                                                                      |
| Radiation                | Mo- <i>K</i> <sub>α1</sub> ( $\lambda = 0.7093$ Å)                                           |                                               |                                               |                                                                           |
| Profile range /°         | $1.0 \leq \theta \leq 20.2$                                                                  |                                               |                                               |                                                                           |
| Peak Type                | PV-TCHZ                                                                                      |                                               |                                               |                                                                           |
| Data Points              | 2560                                                                                         |                                               |                                               |                                                                           |
| Background               | Chebychev polynomial (12 parameters)                                                         |                                               |                                               |                                                                           |

| Sample                    | $\text{Sr}_2\text{Mg}_{0.8}\text{Mn}_{0.2}\text{Si}_2\text{O}_{7+\delta}$ | $\text{Sr}_2\text{Mg}_{0.6}\text{Mn}_{0.4}\text{Si}_2\text{O}_{7+\delta}$ | $\text{Sr}_2\text{Mg}_{0.4}\text{Mn}_{0.6}\text{Si}_2\text{O}_{7+\delta}$ |
|---------------------------|---------------------------------------------------------------------------|---------------------------------------------------------------------------|---------------------------------------------------------------------------|
| Crystal system            | tetragonal                                                                |                                                                           |                                                                           |
| Space group               | <i>P</i> 4 <sub>1</sub> <i>m</i>                                          |                                                                           |                                                                           |
| <i>a</i> / Å              | 8.0483(6)                                                                 | 8.0687(4)                                                                 | 8.0709(3)                                                                 |
| <i>c</i> / Å              | 5.1638(7)                                                                 | 5.1575(4)                                                                 | 5.1581(3)                                                                 |
| <i>V</i> / Å <sup>3</sup> | 334.48(7)                                                                 | 335.78(4)                                                                 | 336.00(3)                                                                 |
| Formula units /Z          | 2                                                                         |                                                                           |                                                                           |
| GOF ( $\chi^2$ )          | 2.70                                                                      | 3.09                                                                      | 2.94                                                                      |
| <i>R</i> <sub>exp</sub>   | 0.89                                                                      | 0.63                                                                      | 0.64                                                                      |
| <i>R</i> <sub>wp</sub>    | 2.39                                                                      | 1.94                                                                      | 1.89                                                                      |
| <i>R</i> <sub>p</sub>     | 1.39                                                                      | 1.20                                                                      | 1.13                                                                      |
| Radiation                 | Mo- <i>K</i> <sub>α1</sub> ( $\lambda = 0.7093$ Å)                        |                                                                           |                                                                           |
| Profile range /°          | $1.0 \leq \theta \leq 20.2$                                               |                                                                           |                                                                           |
| Peak Type                 | PV-TCHZ                                                                   |                                                                           |                                                                           |
| Data Points               | 2560                                                                      |                                                                           |                                                                           |
| Background                | Chebychev polynomial (12 parameters)                                      |                                                                           |                                                                           |

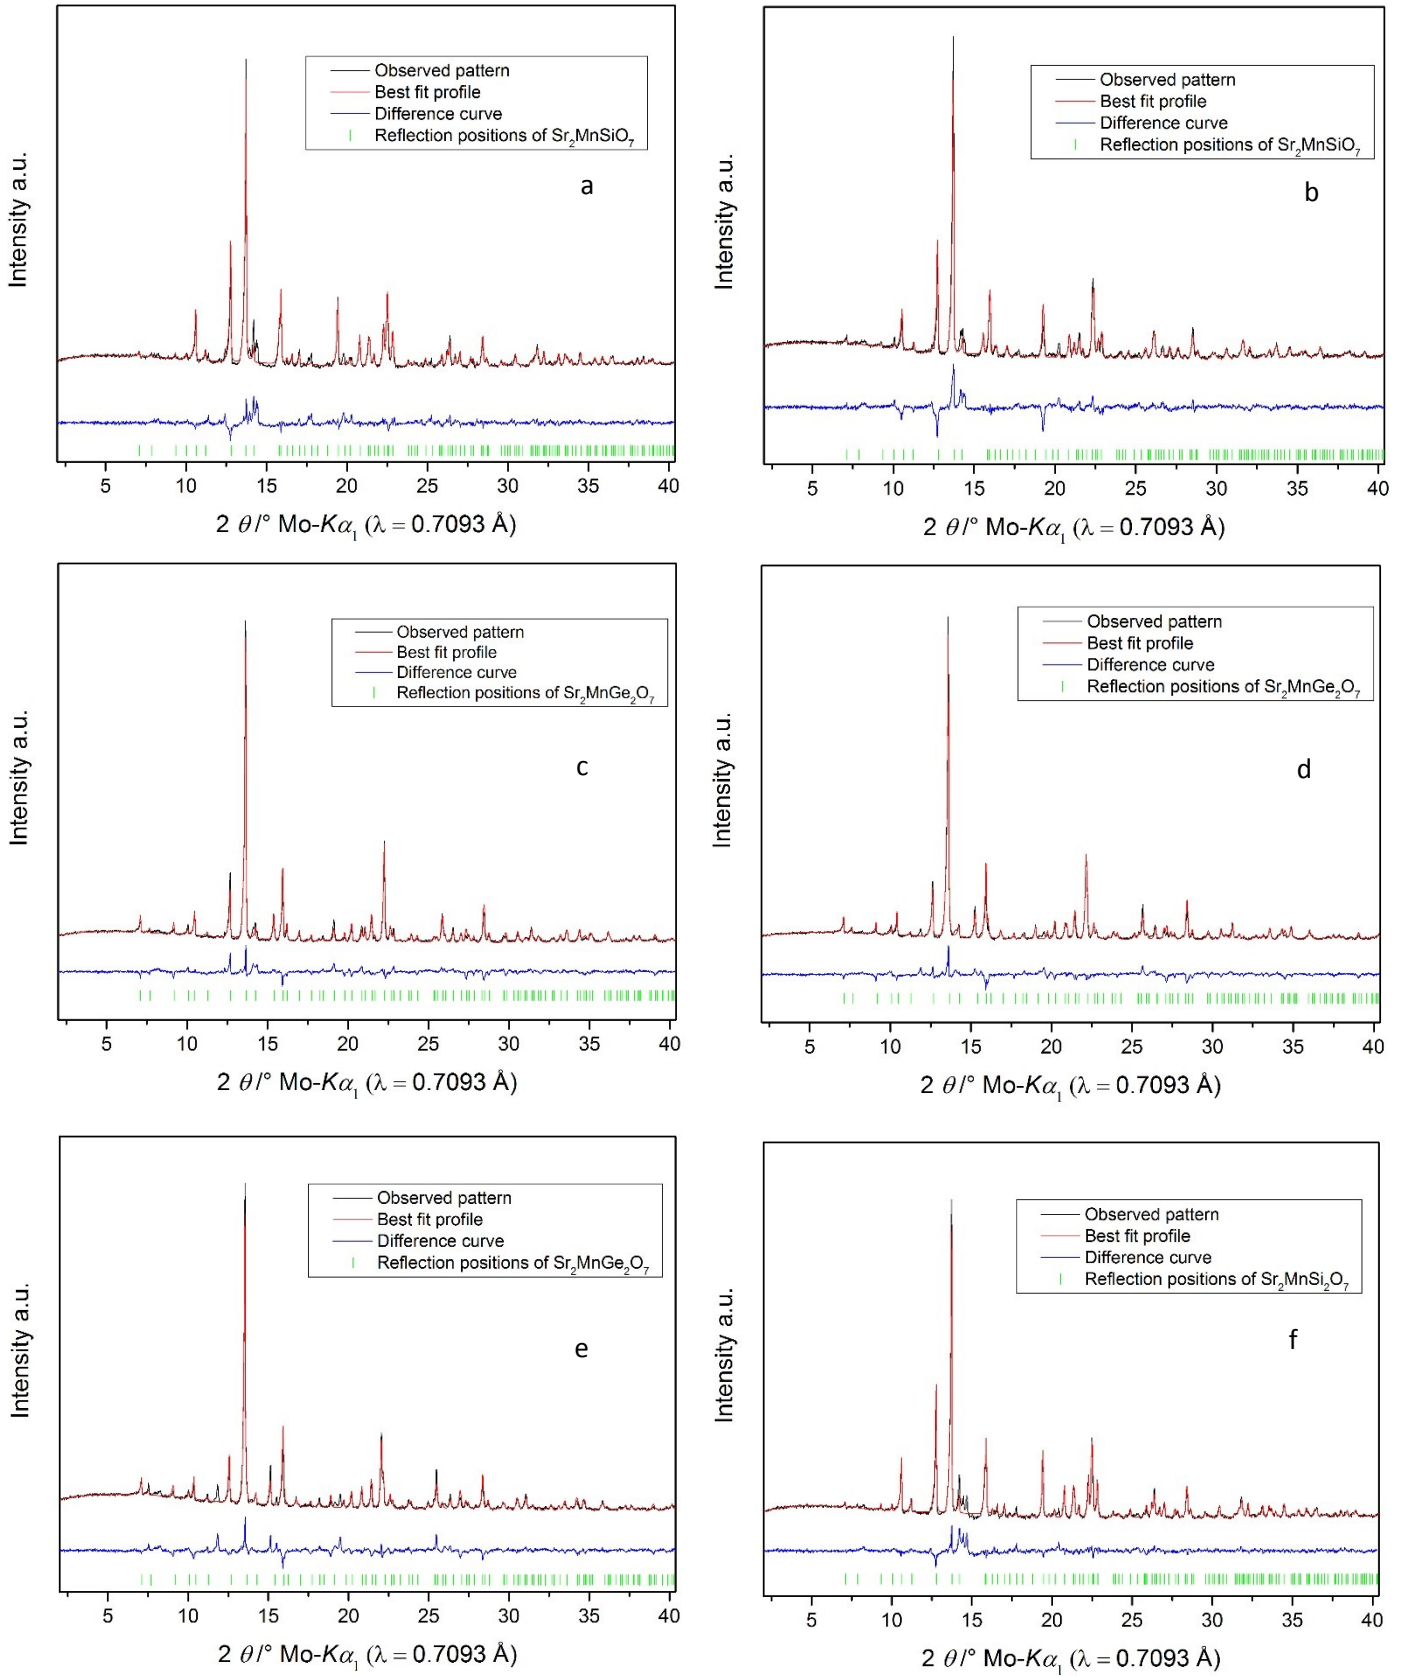

Fig. S1: Rietveld refinements of a)

$\text{Sr}_2\text{Mg}_{0.2}\text{Mn}_{0.8}\text{Si}_2\text{O}_{7+\delta}$ , b)  $\text{Sr}_2\text{Mg}_{0.2}\text{Mn}_{0.8}\text{Ge}_{0.5}\text{Si}_{1.5}\text{O}_{7+\delta}$ , c)  $\text{Sr}_2\text{Mg}_{0.2}\text{Mn}_{0.8}\text{GeSiO}_{7+\delta}$ , d)

$\text{Sr}_2\text{Mg}_{0.2}\text{Mn}_{0.8}\text{Ge}_{1.5}\text{Si}_{0.5}\text{O}_{7+\delta}$ , e)  $\text{Sr}_2\text{Mg}_{0.2}\text{Mn}_{0.8}\text{Ge}_2\text{O}_{7+\delta}$ , and f)  $\text{Sr}_2\text{MnSiO}_{7+\delta}$ .

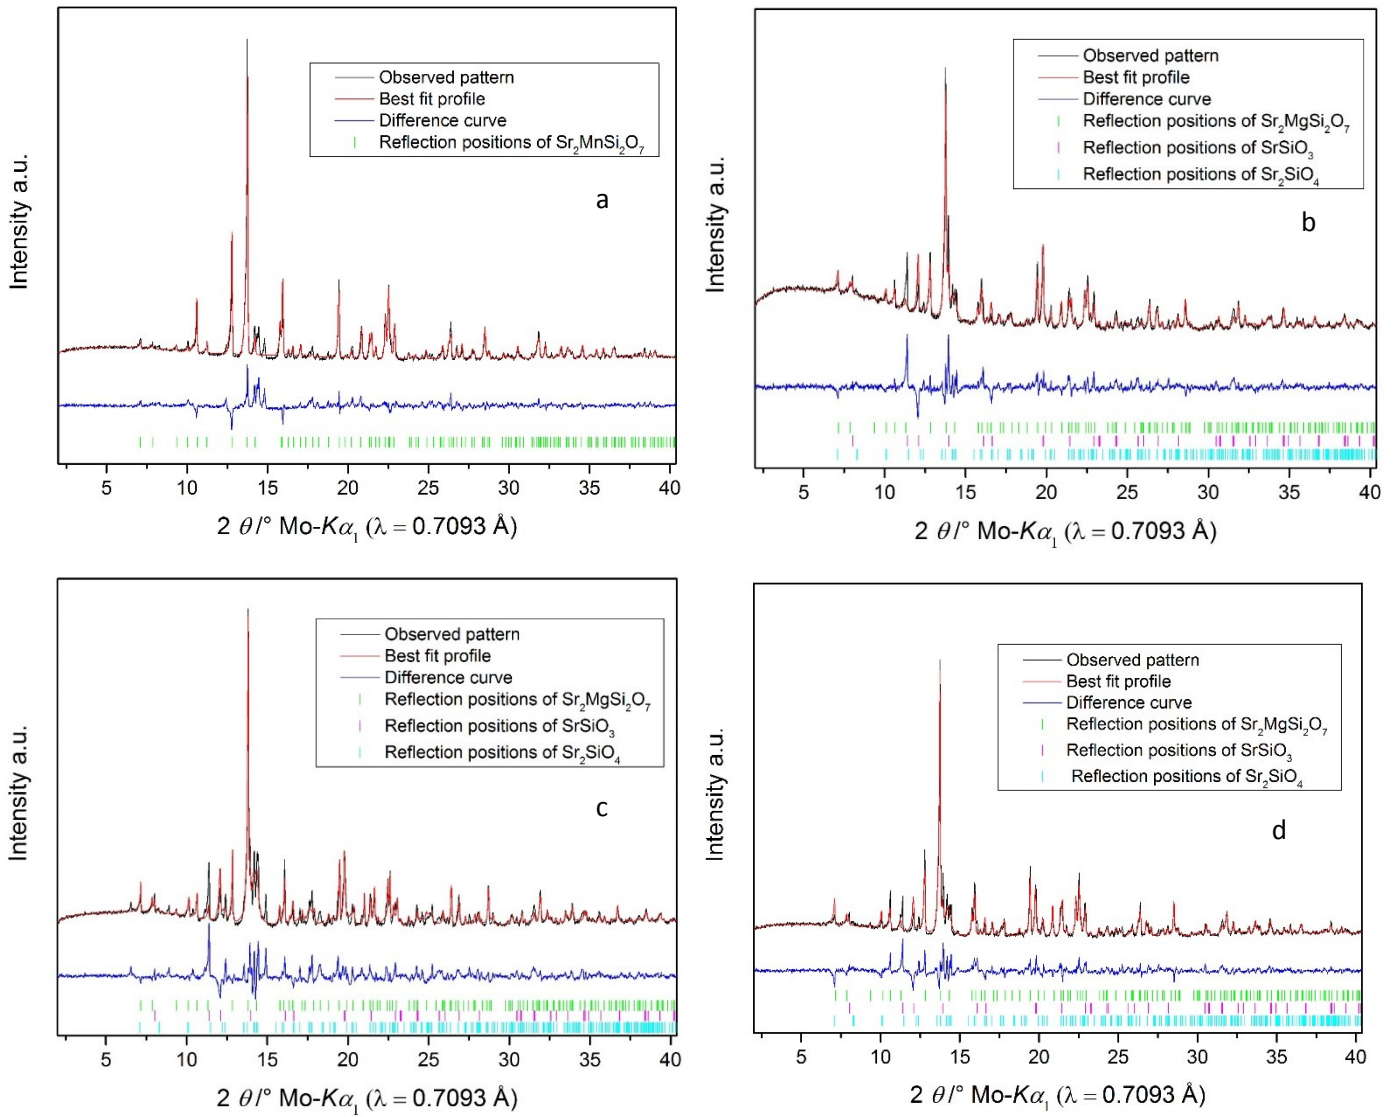

Fig. S2: Rietveld refinements of a)  $\text{Sr}_2\text{Mg}_{0.4}\text{Mn}_{0.6}\text{Si}_2\text{O}_{7+\delta}$ , b)  $\text{Sr}_2\text{Mg}_{0.8}\text{Mn}_{0.2}\text{Si}_2\text{O}_{7+\delta}$ , c)  $\text{Sr}_2\text{MgSi}_2\text{O}_{7+\delta}$ , and d)  $\text{Sr}_2\text{Mg}_{0.6}\text{Mn}_{0.4}\text{Si}_2\text{O}_{7+\delta}$ .
